# Supplementary material for: Targeting of the Dosage-Compensated Male X-Chromosome during Early Drosophila Development
Source: PubMed Central journal article supplement — Cell Rep. Author manuscript; Available in PMC 2020 Jan 9. (PMC6952266; doi:10.1016/j.celrep.2019.11.095), 2019-12-24
Supplement: NIHMS1547522-supplement-1.pdf [file NIHMS1547522-supplement-1.pdf]

**Cell Reports, Volume 29**

**Supplemental Information**

**Targeting of the Dosage-Compensated**

**Male X-Chromosome during Early**

***Drosophila* Development**

**Leila Elizabeth Rieder, William Thomas Jordan III, and Erica Nicole Larschan**

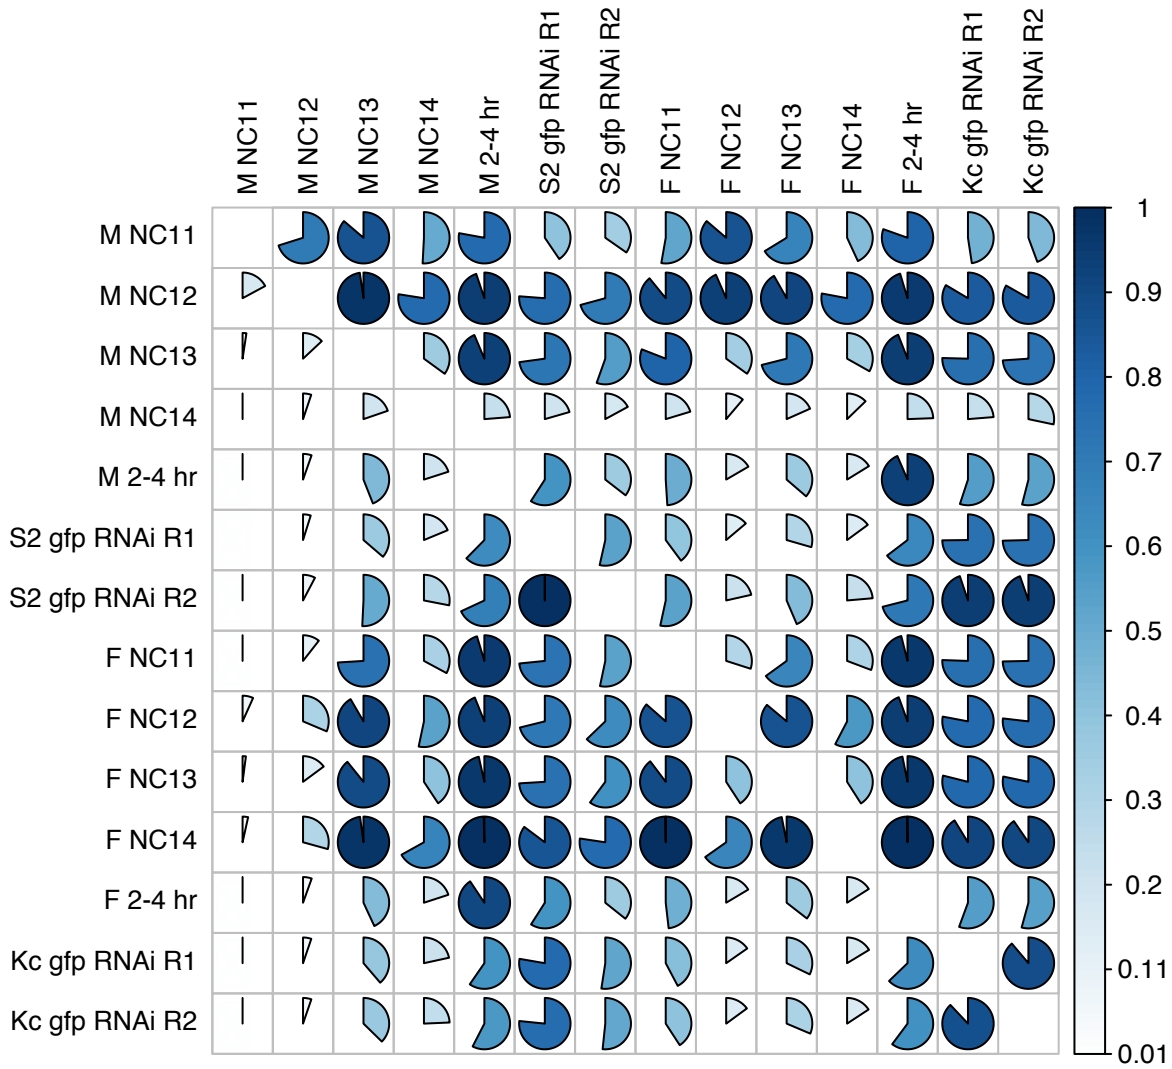

**Figure S1 (related to Figure 2).** Percent overlap of CLAMP ChIP-seq peaks between all samples from the current study and previous cell culture CLAMP ChIP-seq samples. Cell culture (S2, male; Kc, female) CLAMP ChIP-seq data from Soruco et al. 2013, NCBI accession number GSE39271.

**A. Male, CLAMP ChIP**

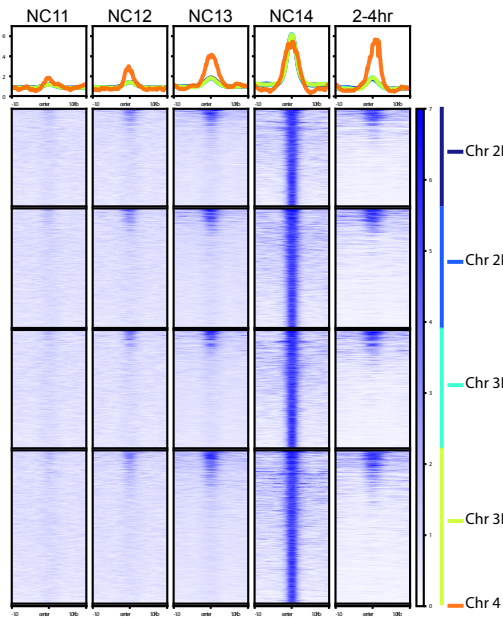

**C. Male, MSL3 ChIP**

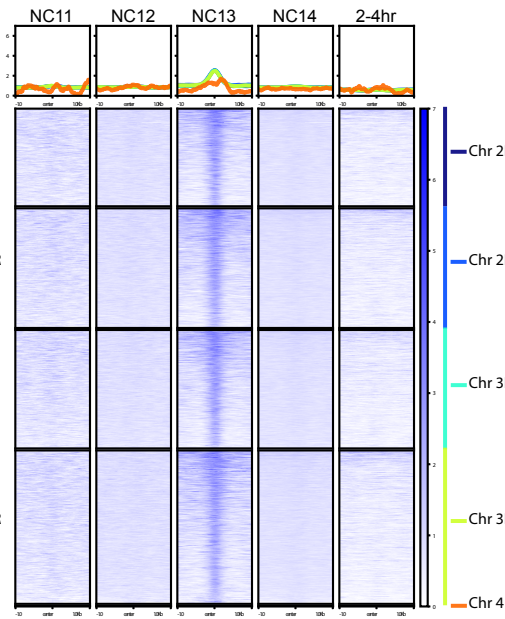

**D. Male, H4K16ac ChIP**

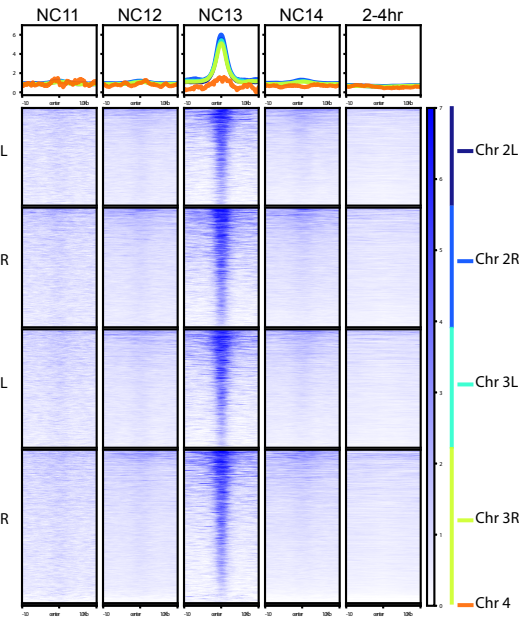

**B. Female, CLAMP ChIP**

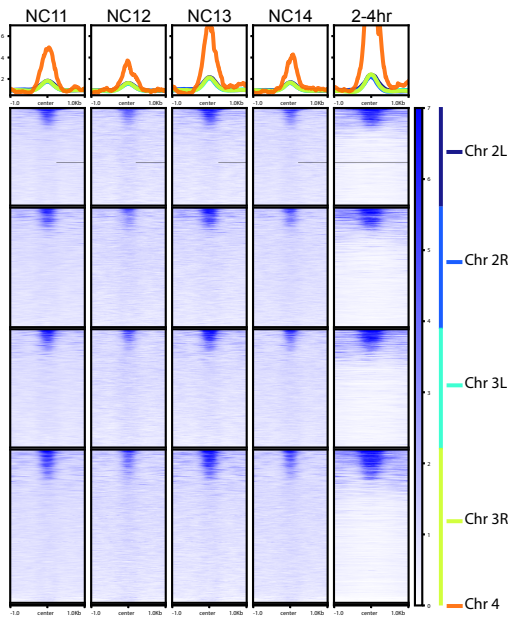

**E. Female, H4K16ac ChIP**

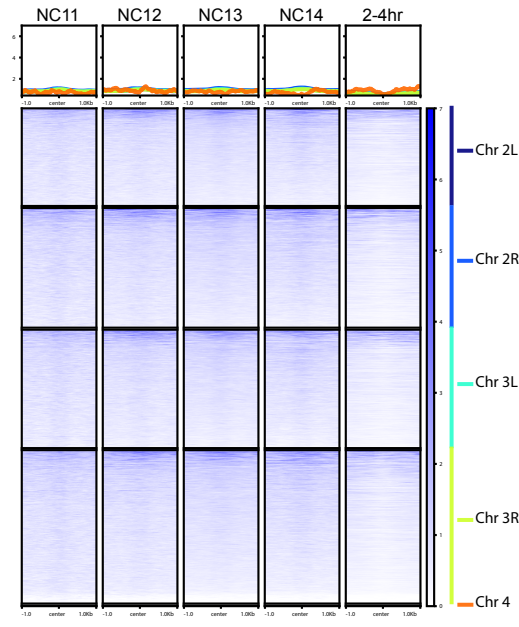

**Figure S2 (related to Figure 2).** Staged, sexed ChIP-seq heat maps at autosomal CLAMP sites. Data are mapped over autosomal CLAMP sites and broken into chromosomes: 2L, dark blue; 2R, light blue; 3L, teal; 3R, light green; 4, orange. (A) CLAMP ChIP-seq from male embryos. (B) CLAMP ChIP-seq from female embryos. (C) MSL3 ChIP-seq from male embryos. (D) H4K16ac ChIP-seq from male embryos. (E) H4K16ac ChIP-seq from female embryos.

## A. Male, CLAMP ChIP

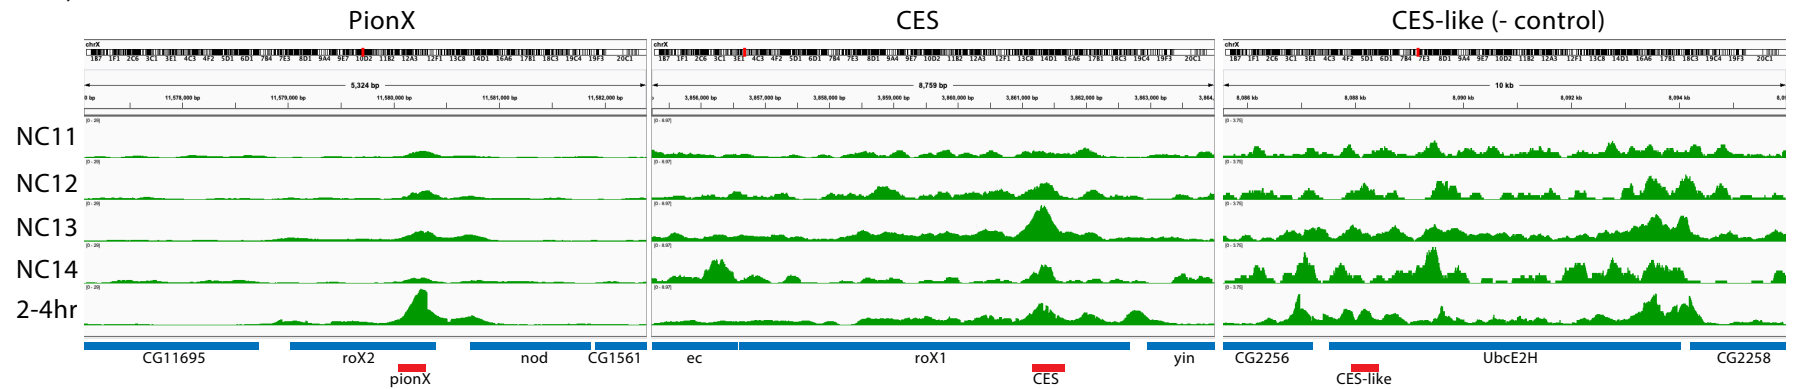

## B. Female, CLAMP ChIP

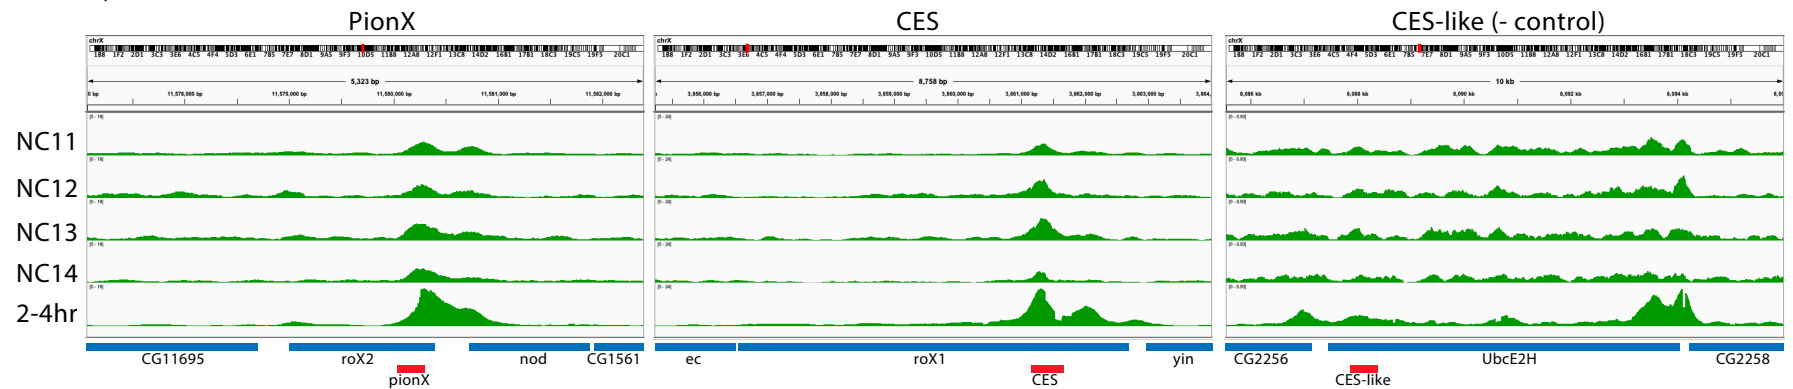

## C. Male, MSL3 ChIP

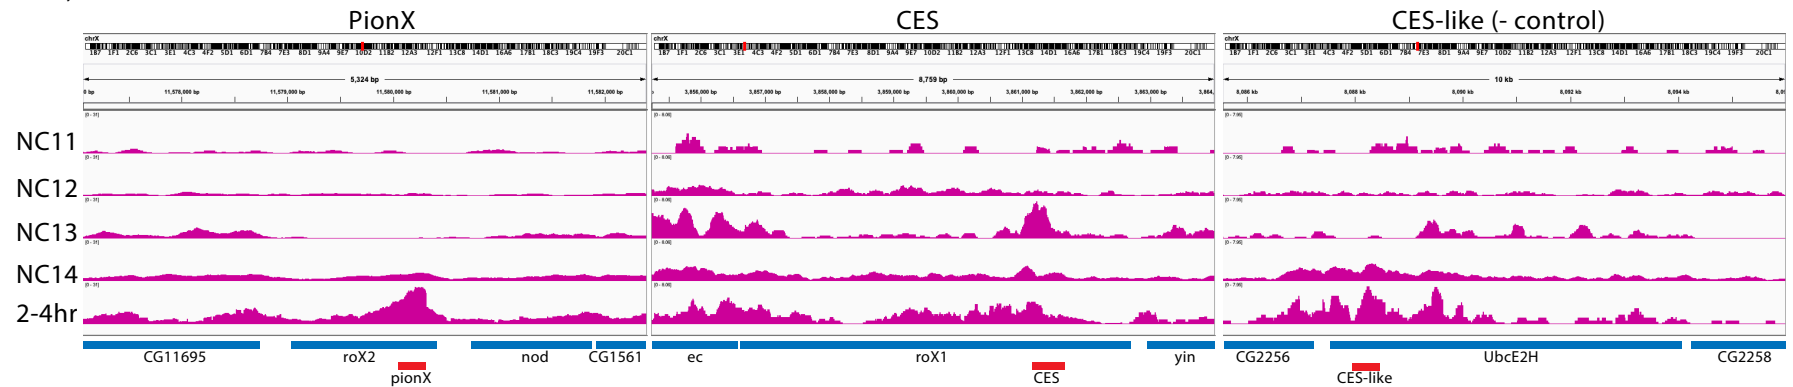

**Figure S3 (related to Figure 2).** CLAMP (A and B) and MSL3 (C) ChIP-seq profiles over individual loci representative of classes in **Figure 2**, including *roX2* (PionX; Villa et al. 2016), *roX1* (CES; Soruco et al. 2013, Alekseyenko et al. 2008), and *UbcE2H* (CES-like; Soruco et al. 2013, Alekseyenko et al. 2008). Nearby genes are represented in blue and PionX, CES, and CES-like sites in red. Profiles generated in Integrative Genomics Viewer. Data are group autoscaled.
